# Supplementary material
Source: Hindawi journal article supplement (doi:10.1155/2010/489060)

## Supplementary data

### Synthesis and G-quadruplex binding properties of defined acridine oligomers.

Rubén Ferreira, Anna Aviñó, Ricardo Pérez-Tomás, Raimundo Gargallo, Ramon  
Eritja\*

#### CONTENTS:

**Figure S1.** HPLC and MALDI-TOF spectra

**Figure S2.** Fluorescence titrations spectra of compounds **2-4** with oligonucleotide  
sequences 24bcl, cmyc, Dickerson and HT24

**Figure S3.** Circular dichroism spectra of cmyc sequence in the presence of compound **1**.

**Figure S1.** HPLC and MALDI-TOF spectra. See conditions in Material and Methods section.

### Compound 1

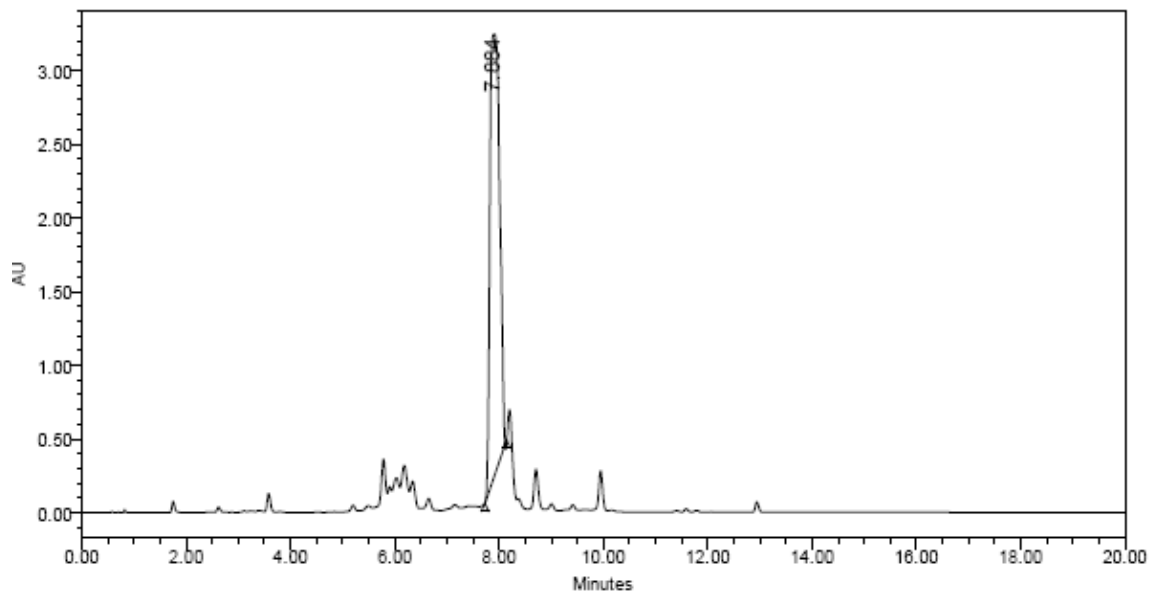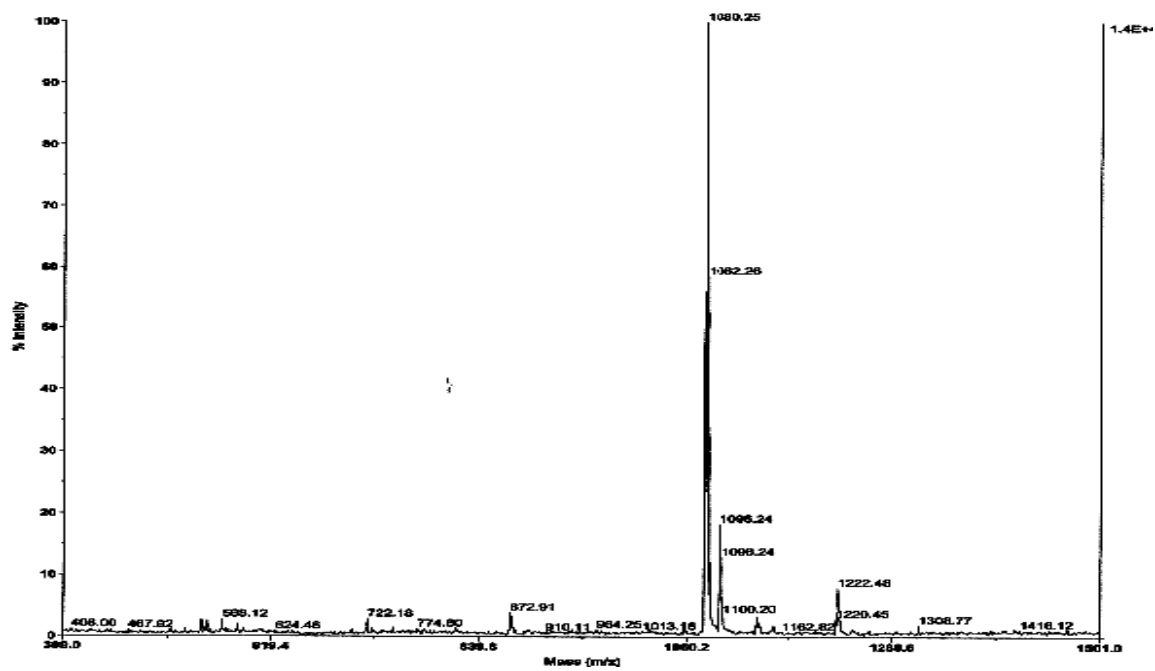

# Compound 2

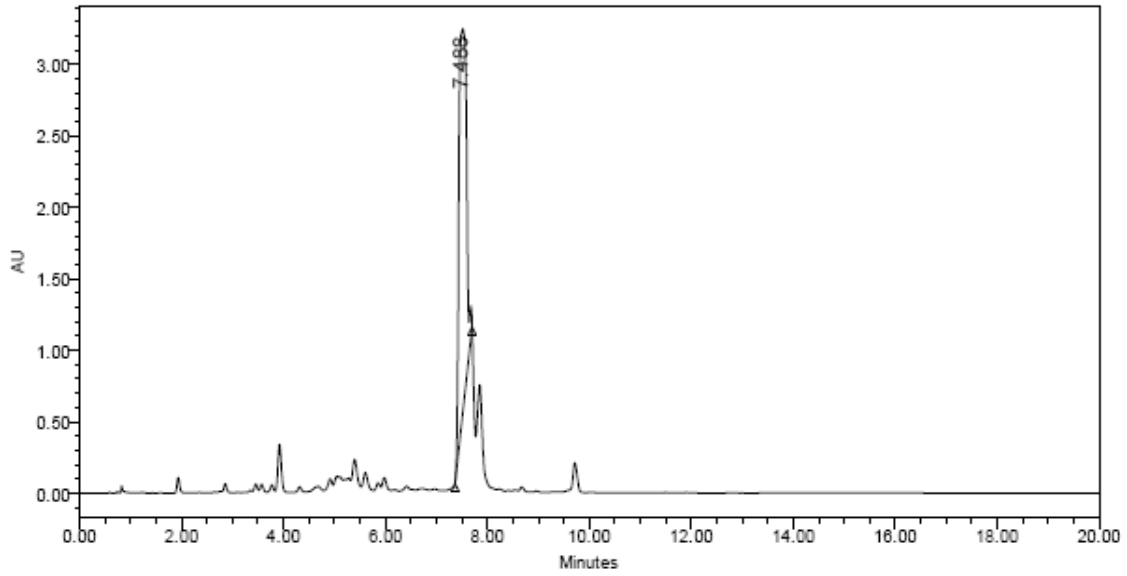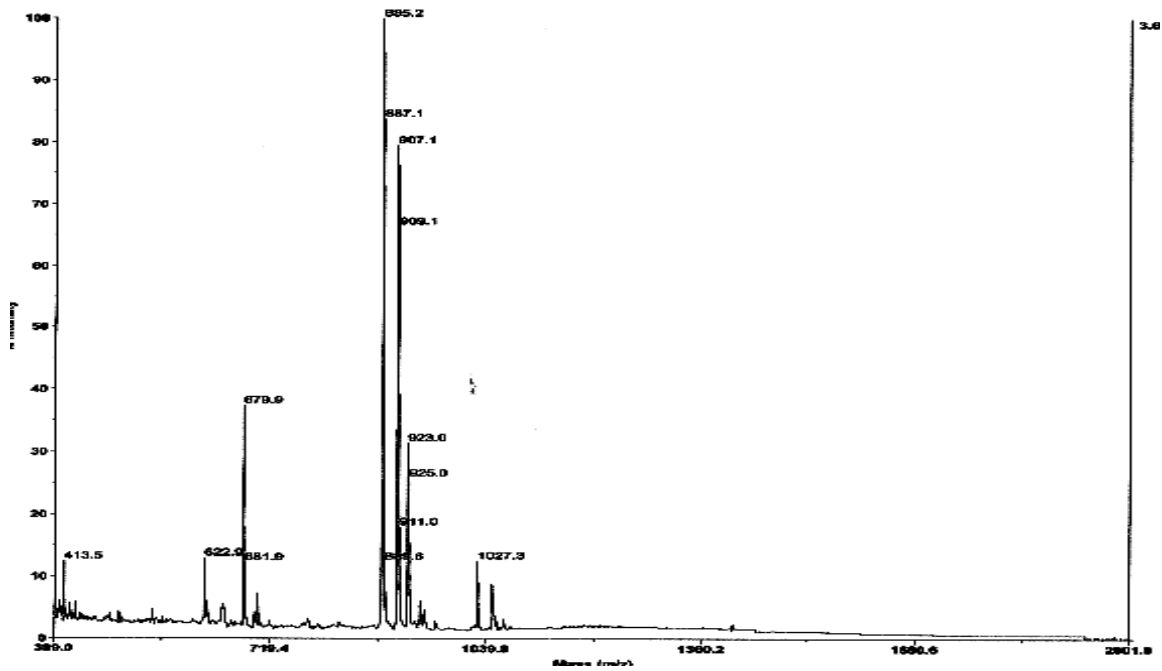

# Compound 3

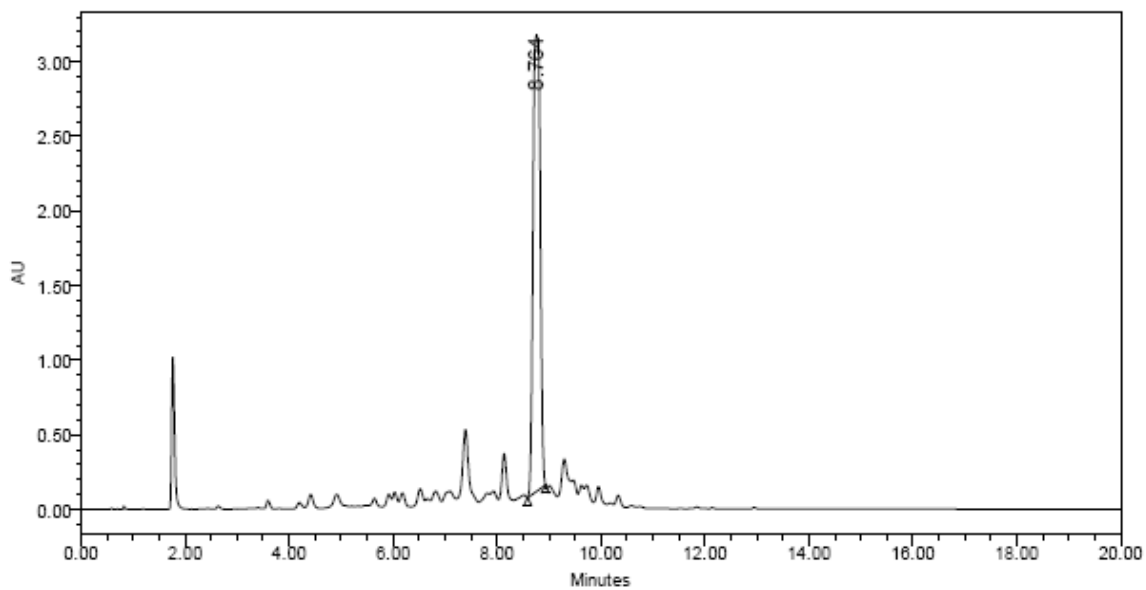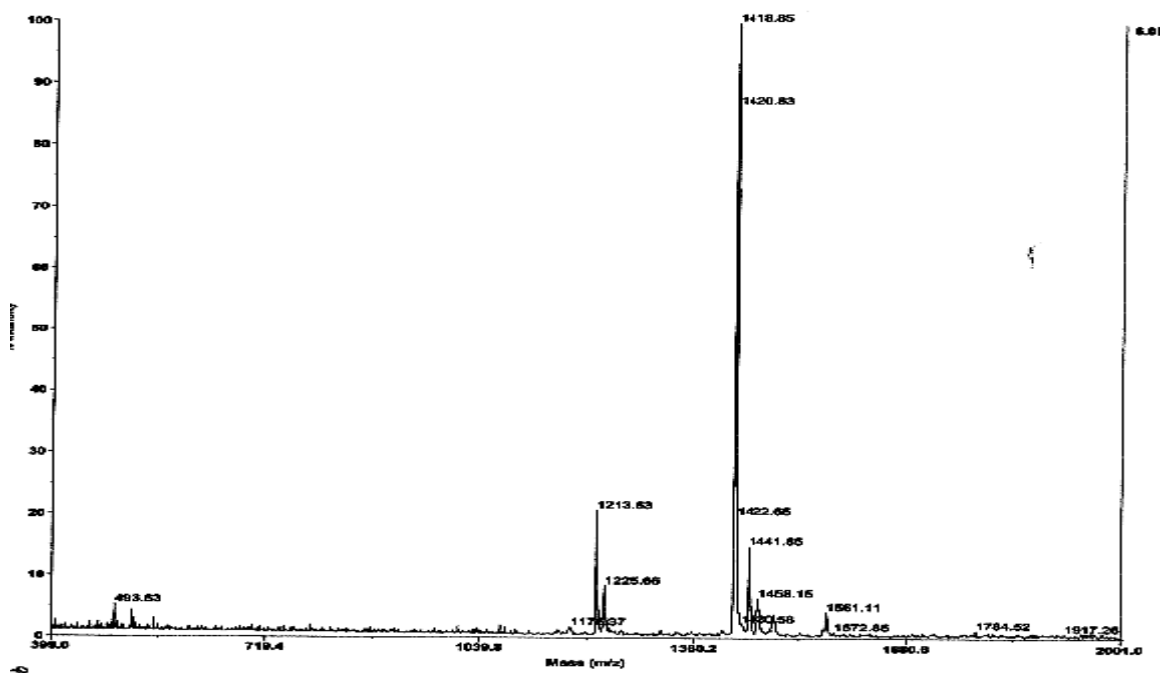

# Compound 4

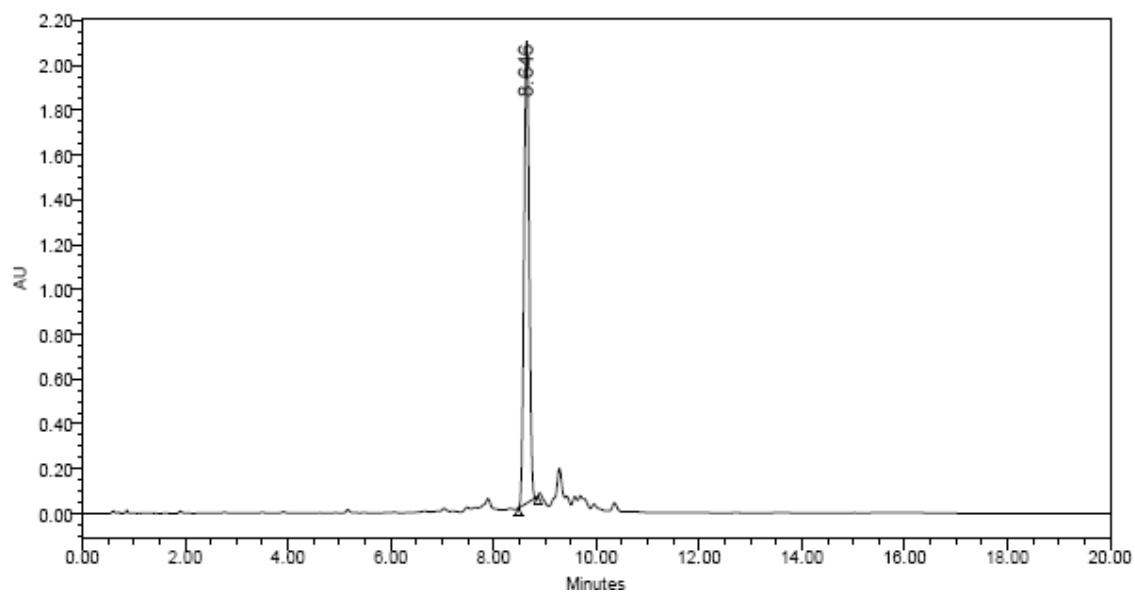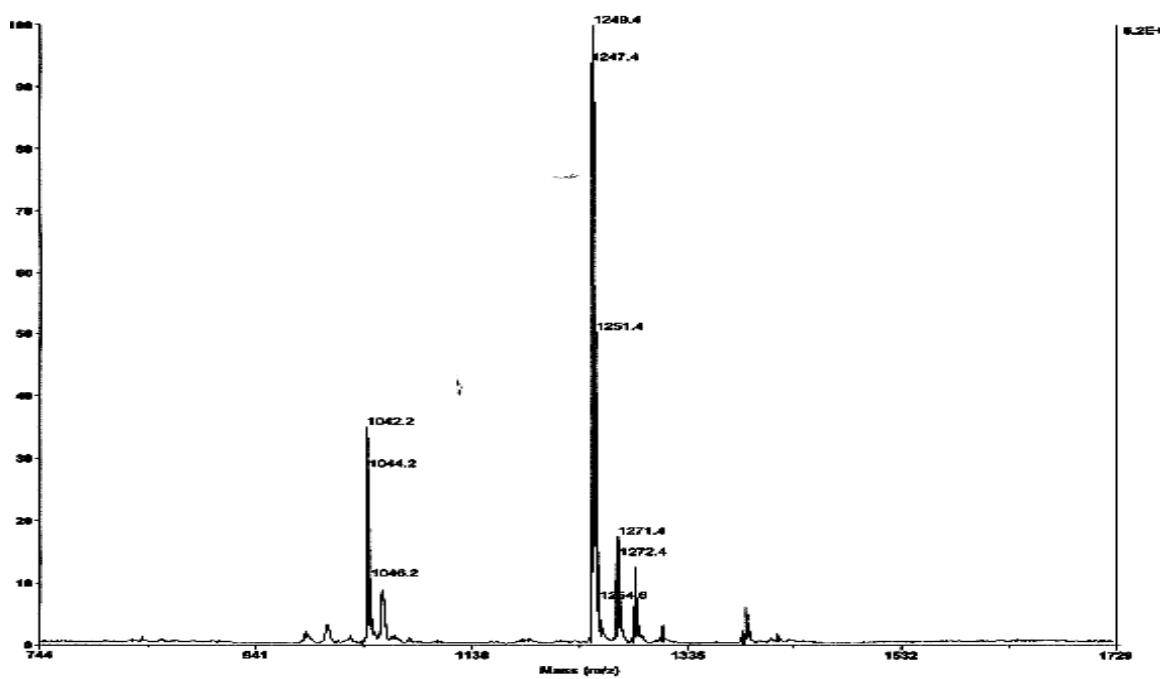

**Figure S2.** Fluorescence titrations spectra of compounds **2-4** with oligonucleotide sequences 24bcl, cmyc, Dickerson and HT24. See conditions in Material and Methods section.

**Compound 2 and 24bcl sequence**

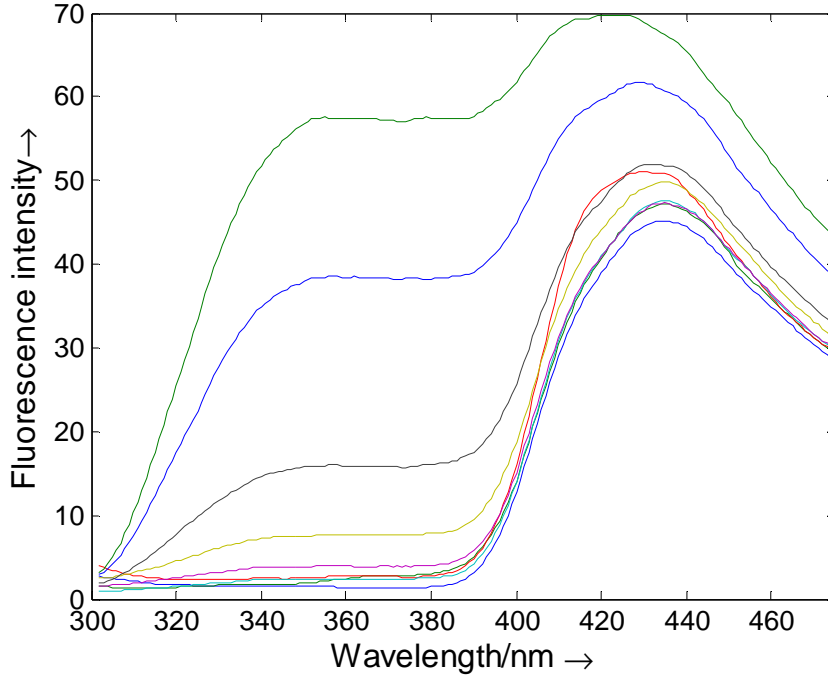

**Compound 2 and cmyc sequence**

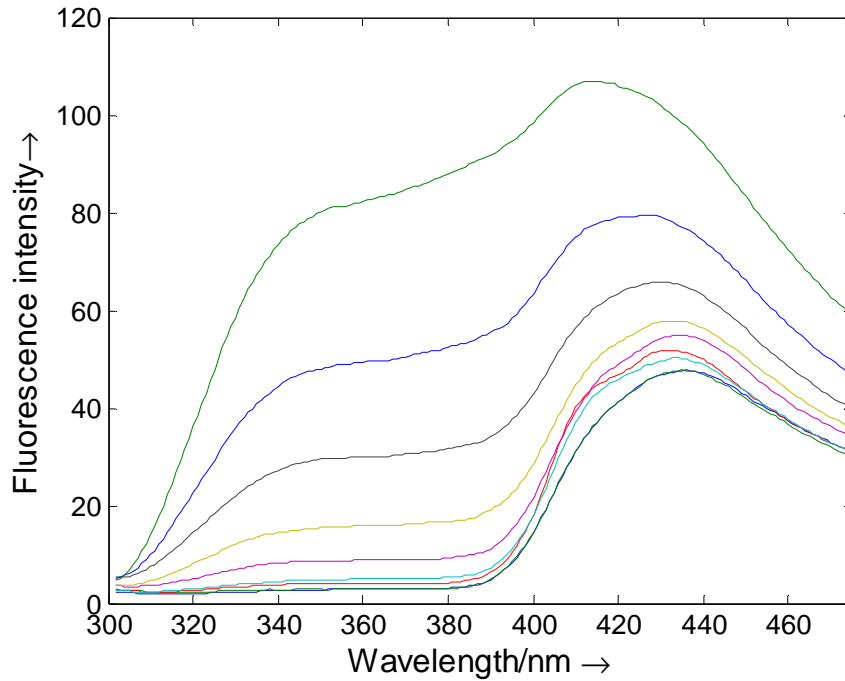

### Compound 2 and Dickerson sequence

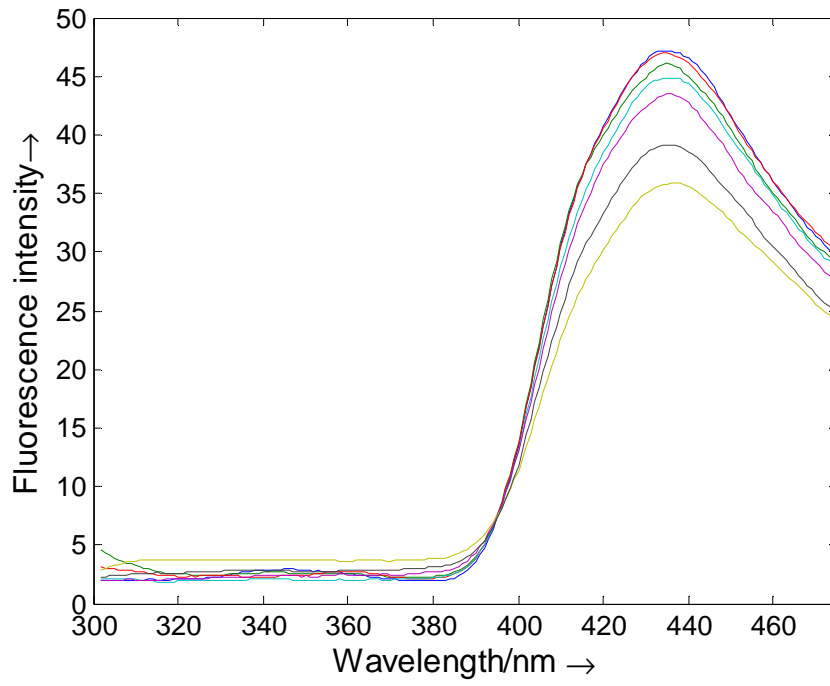

### Compound 2 and HT24 sequence

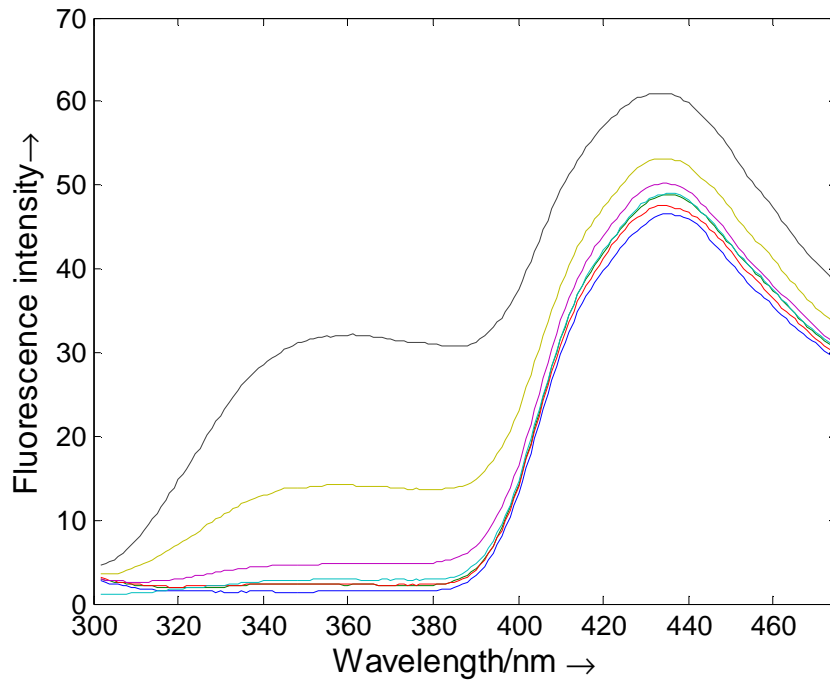

### Compound 3 and 24bcl sequence

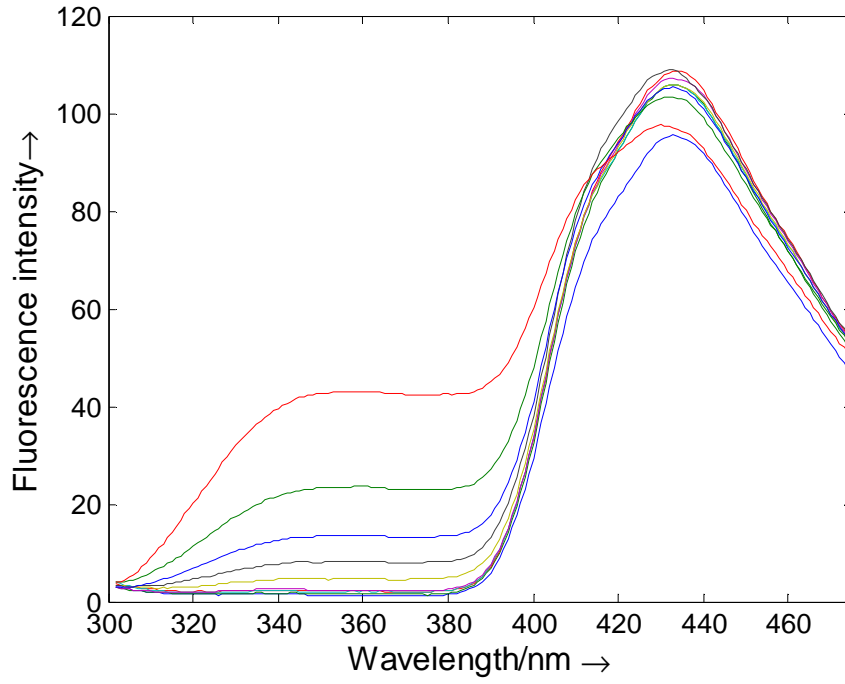

### Compound 3 and cmyc sequence

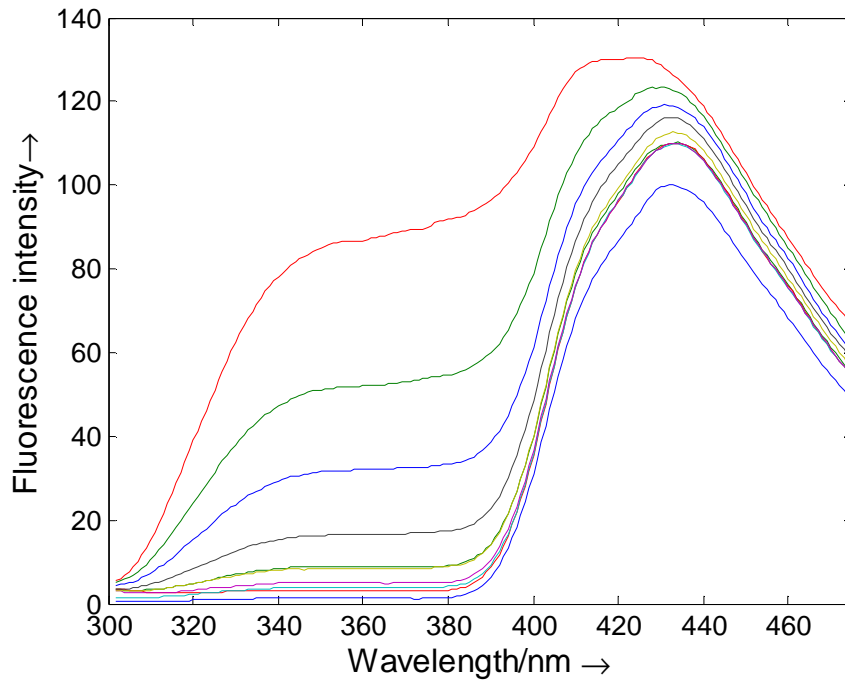



### Compound 3 and Dickerson sequence

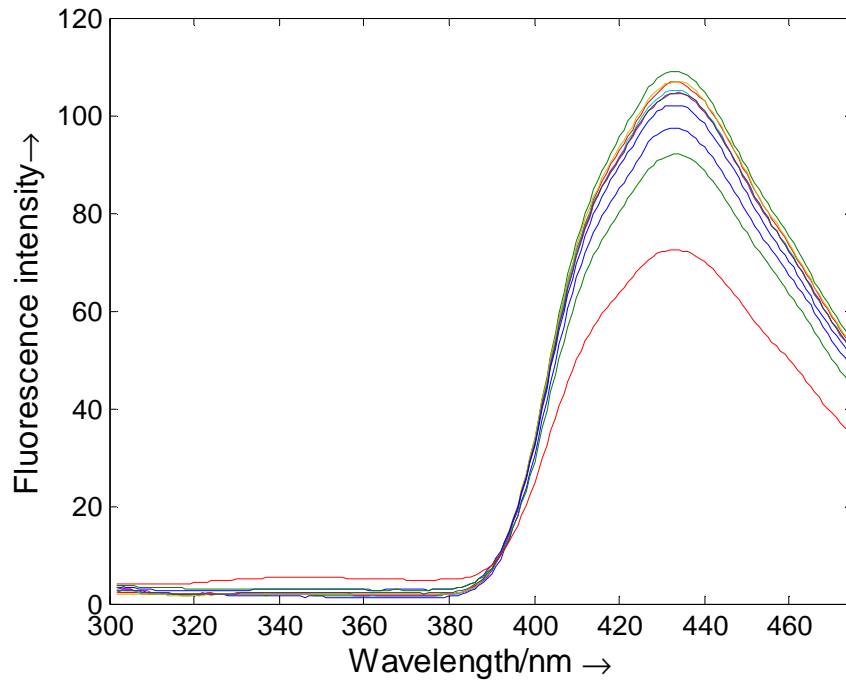

### Compound 3 and HT24 sequence

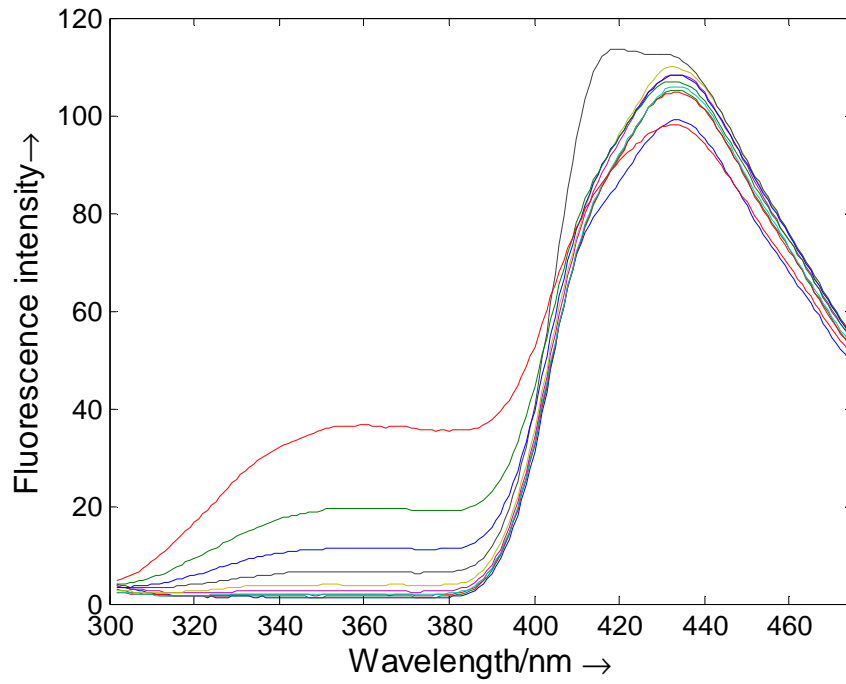

### Compound 4 and 24bcl sequence

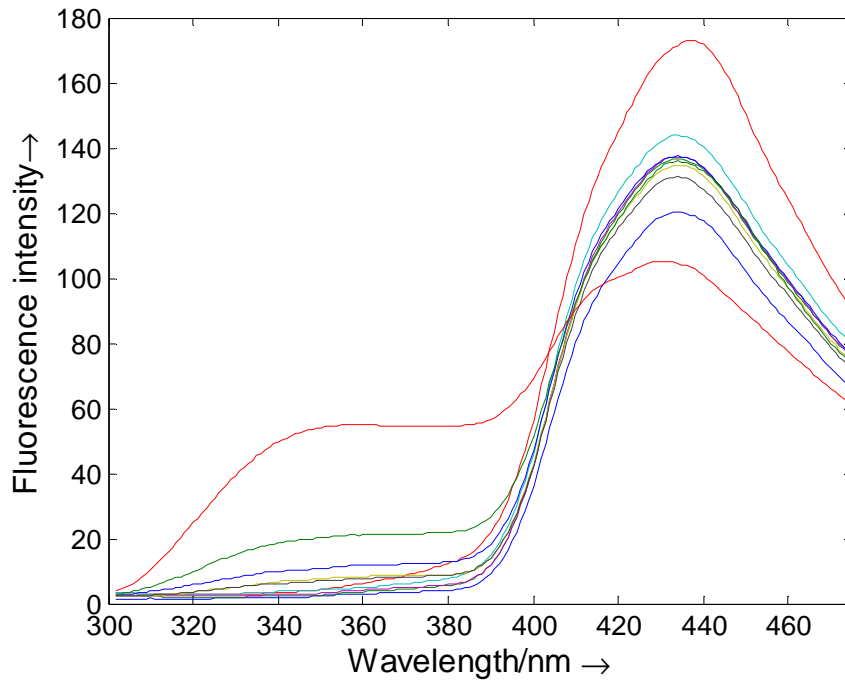

### Compound 4 and cmyc sequence

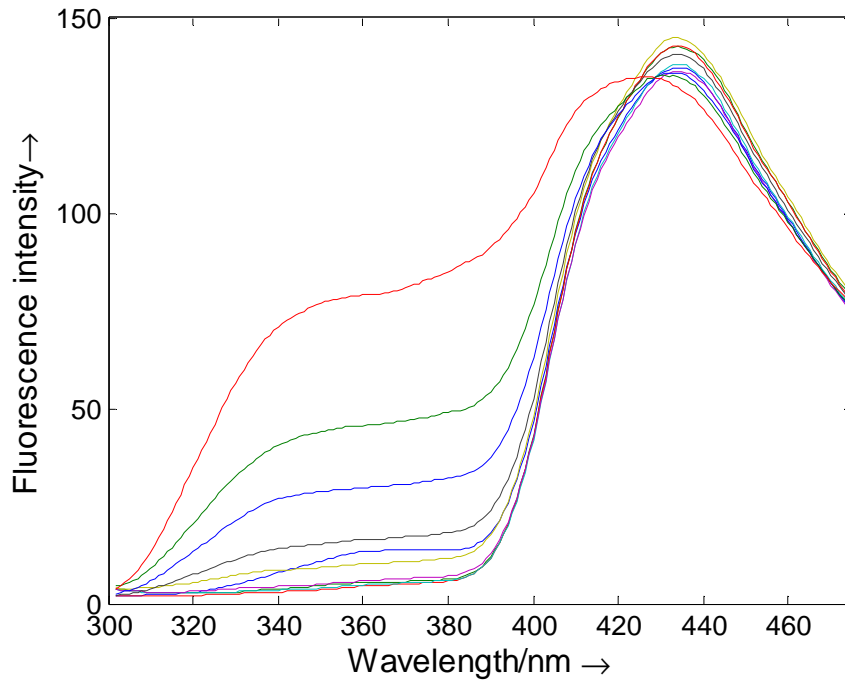

### Compound 4 and Dickerson sequence

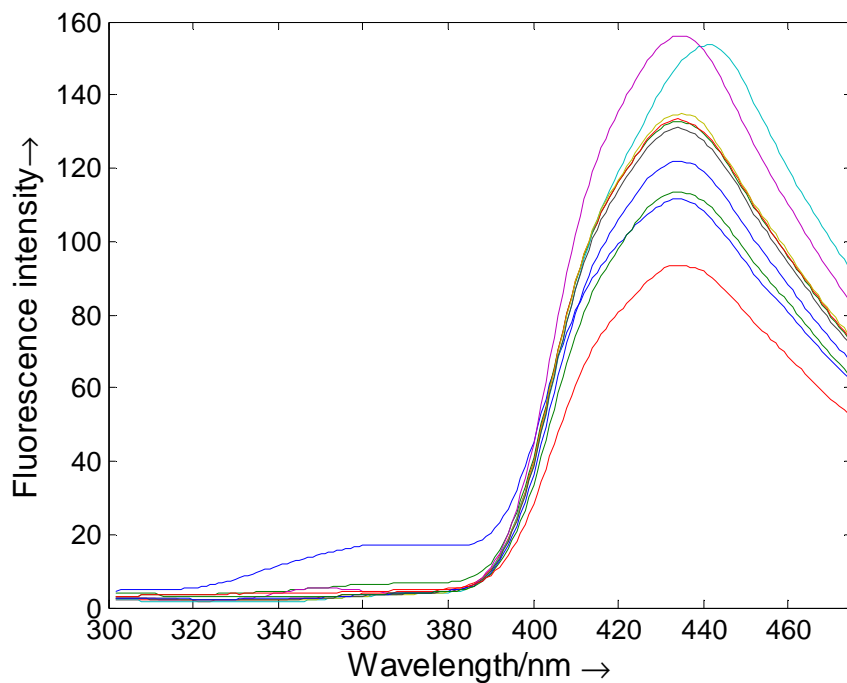

### Compound 4 and HT24 sequence

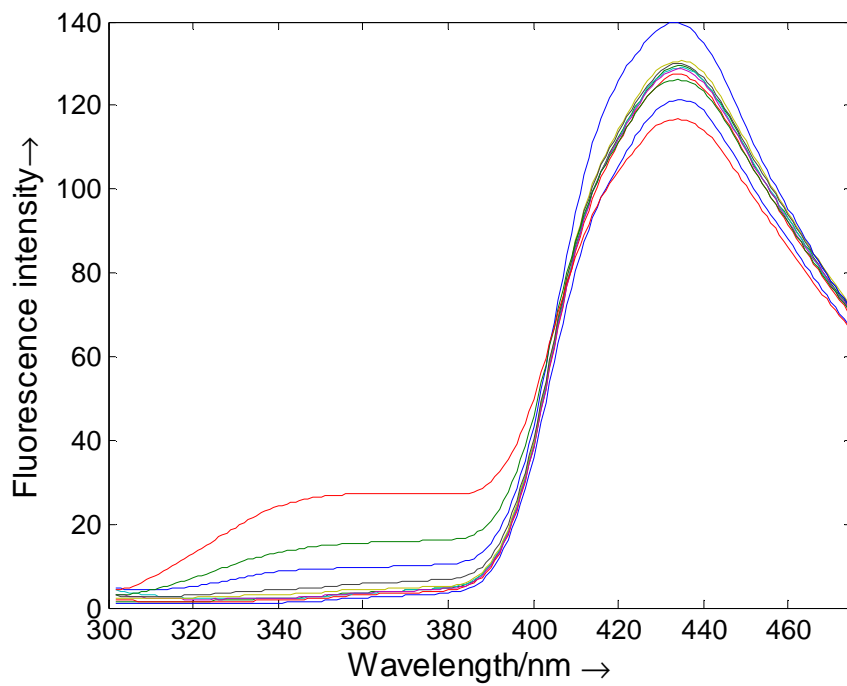

**Figure S3.** Circular dichroism spectra of cmyc sequence in the presence of compound **1**. To a 1  $\mu\text{M}$  solution of the oligonucleotide were added an increasing amount of **1** (from 0 to 8  $\mu\text{M}$ ) in potassium phosphate buffer (185 mM NaCl, 185 mM KCl, sodium phosphate, 1 mM EDTA, pH 7). The CD spectra were recorded after 24 hours.

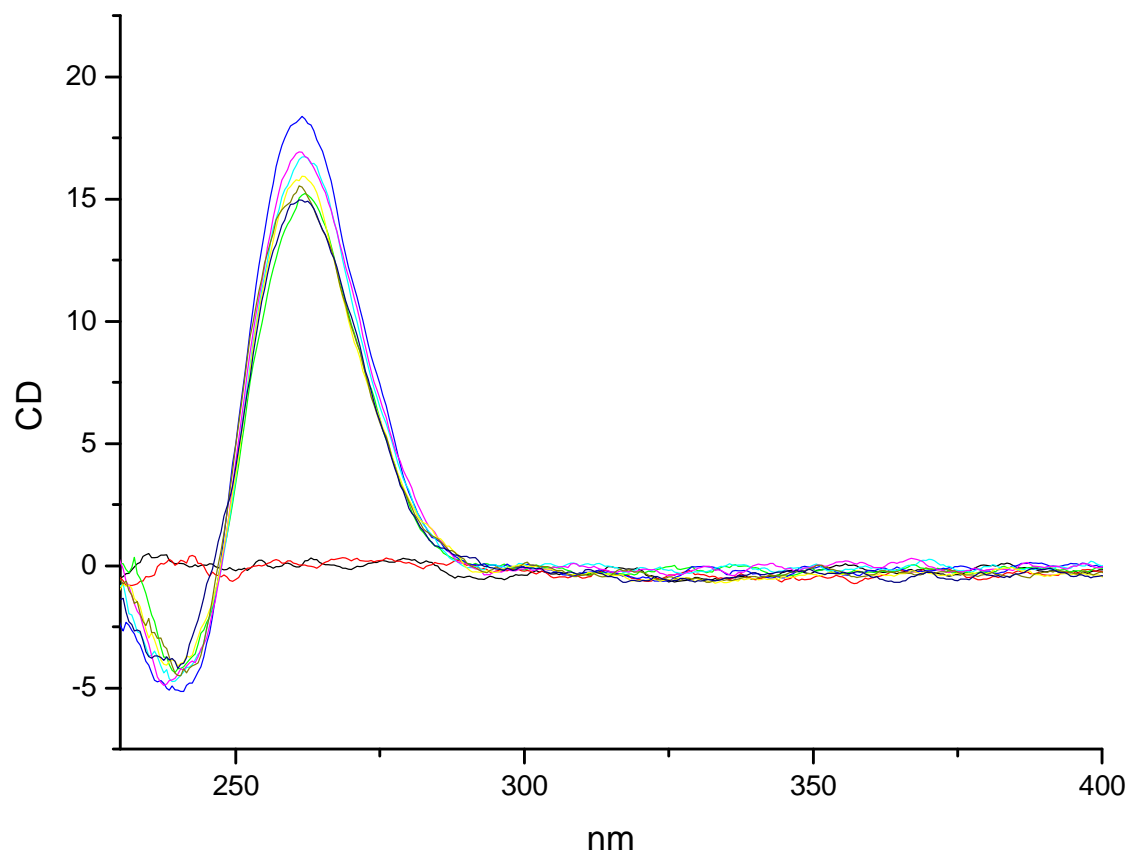

Supplement: f1 [file 489060.f1.pdf]
